# Supplementary material
Source: MDPI journal article supplement (https://www.mdpi.com/2304-6732/8/8/293)
Supplement: s1 [file s1]

# **Efficient Deep-Blue Electroluminescence Employing Heptazine-Based Thermally Activated Delayed Fluorescence**

Jie Li <sup>1</sup>, Jincheng Zhang <sup>1</sup>, Heqi Gong <sup>1</sup>, Li Tao <sup>1</sup>, Yanqing Wang <sup>2</sup> and Qiang Guo <sup>1,\*</sup>

<sup>1</sup>*College of Optoelectronic Engineering, Chengdu University of Information Technology, Chengdu 610225, China*

<sup>2</sup>*College of Polymer Science and Engineering, Sichuan University, Chengdu 610065, China*

*\*Correspondence: qiangguo@cuit.edu.cn*

## **Table of Contents**

### **1. Instrumentation**

### **2. Copies of <sup>1</sup>H and <sup>13</sup>C NMR spectra of HAP-3DPA**

### **3. Quantum Chemical Calculations**

### **4. Photophysical Properties**

### **5. References**

## 1. Instrumentation

NMR spectra were obtained on a Varian Inova 400 spectrometer. The  $^1\text{H}$  NMR (400 MHz) and  $^{13}\text{C}$  NMR (100 MHz) chemical shifts were measured relative to DMSO- $d_6$  as the internal reference (DMSO- $d_6$ :  $\delta = 2.50$  ppm for  $^1\text{H}$  and  $\delta = 39.52$  ppm for  $^{13}\text{C}$  respectively). High-resolution mass spectra (HRMS) were obtained with Waters-Q-TOF-Premier (ESI $^+$ ). Elemental analysis was performed with a Yanaco MT-5 elemental analyzer. The UV and PL spectra were recorded with a Shimadzu UV-2550 spectrophotometer and Shimadzu RF-5301PC fluorescence spectrometer, respectively. The PLQY and transient PL decay were recorded using a Hamamatsu C9920-02 and a Hamamatsu C11367-03 measurement system, respectively. Transient PL decay characteristics of film samples under vacuum conditions were measured on a streak camera (C4334, Hamamatsu Photonics) equipped with cryostat using a YAG laser with an excitation wavelength of 355 nm. The highest occupied molecular orbital (HOMO) energy level of HAP-3DPA was determined by atmospheric ultraviolet photoelectron spectroscopy (AC-3E, Riken Keiki). The lowest unoccupied molecular orbital (LUMO) level was calculated by subtracting the energy gap from the HOMO level. Oxygen-free sample solutions ( $1 \times 10^{-4}$  mol L $^{-1}$ ) were degassed with N $_2$  for 15 min prior to use unless otherwise indicated. Pure and doped films (100 nm) were deposited on quartz and silicon substrates by vacuum thermal evaporation at a pressure lower than  $5 \times 10^{-4}$  Pa.

## 2. Copies of $^1\text{H}$ and $^{13}\text{C}$ NMR spectra of HAP-3DPA

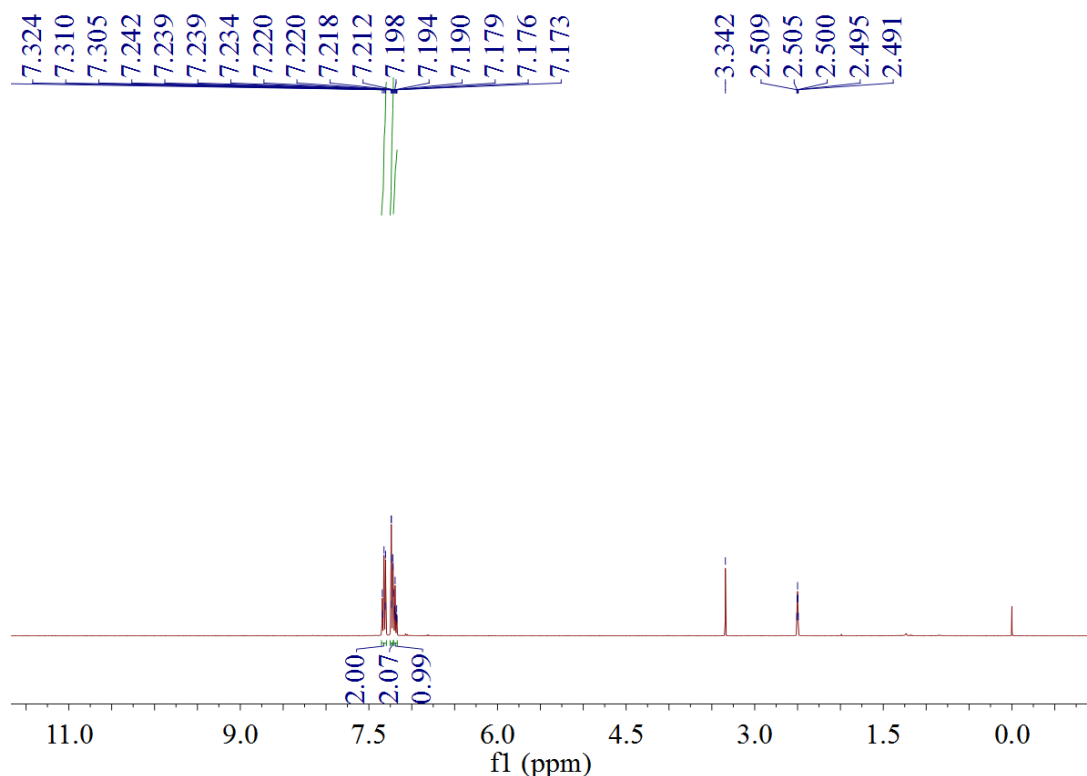

**Figure S1.**  $^1\text{H}$  NMR spectrum of HAP-3DPA in DMSO- $d_6$ .

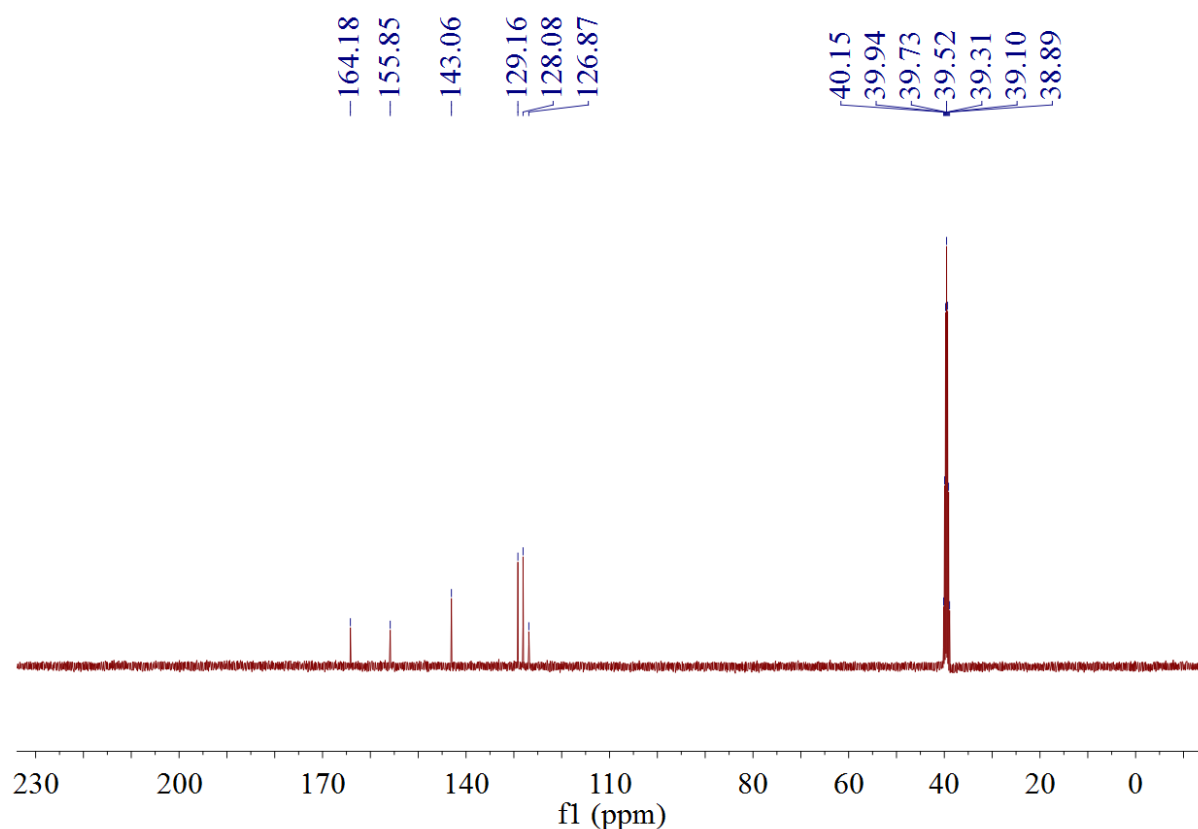

**Figure S2.**  $^{13}\text{C}$  NMR spectrum of **HAP-3DPA** in  $\text{DMSO-}d_6$ .

### 3. Quantum Chemical Calculations

All calculations were performed using the Gaussian 09 program package. The HOMO and LUMO of HAP-3DPA and 4,4,4''-(1,3,3a<sup>1</sup>,4,6,7,9-heptaazaphenalene-2,5,8-triyl)tris(*N*, *N*-bis(4-(*tert*-butyl)phenyl)aniline) (HAP-3TPA) were calculated using the nonlocal density functional of Becke's 3-parameters employing Lee-Yang-Parr functional (B3LYP) with the 6-31G(d) basis set. Their  $S_1$  and  $T_1$  were calculated by the time-dependent density functional theory (TD-DFT) method at the optimized ground-state geometries using the B3LYP mode with a 6-31G(d) basis set [S1].

#### 3.1 The Optimized Geometry Data for HAP-3DPA (unit: Å)

|   |         |          |          |
|---|---------|----------|----------|
| C | 7.09961 | 1.47268  | 0.09892  |
| C | 6.97458 | 0.58702  | -0.97246 |
| C | 5.88263 | -0.27728 | -1.04483 |
| C | 4.91002 | -0.26081 | -0.04034 |
| C | 5.0367  | 0.62     | 1.03838  |
| C | 6.12691 | 1.48609  | 1.10084  |
| N | 3.82158 | -1.20168 | -0.10998 |
| C | 2.51016 | -0.7897  | -0.07372 |

|   |          |          |          |
|---|----------|----------|----------|
| N | 2.29899  | 0.53927  | -0.08337 |
| C | 1.03757  | 0.95134  | -0.04376 |
| N | 0.00053  | -0.00126 | -0.00503 |
| C | 0.30736  | -1.37553 | -0.00278 |
| N | 1.57809  | -1.75888 | -0.0299  |
| N | 0.73369  | 2.24367  | -0.04691 |
| C | -0.57179 | 2.56641  | -0.00451 |
| N | -1.61694 | 1.71953  | 0.03483  |
| C | -1.34292 | 0.42066  | 0.03045  |
| N | -2.30961 | -0.48861 | 0.06941  |
| C | -1.93563 | -1.781   | 0.06401  |
| N | -0.67973 | -2.26265 | 0.02702  |
| N | -0.87098 | 3.90832  | -0.00022 |
| N | -2.94821 | -2.7108  | 0.10097  |
| C | -2.67981 | -4.11993 | 0.22479  |
| C | -4.33167 | -2.31889 | 0.02082  |
| C | 0.1578   | 4.91235  | 0.08172  |
| C | -2.23031 | 4.37855  | -0.07392 |
| C | -2.69701 | 5.25353  | 0.91191  |
| C | -3.99272 | 5.76331  | 0.83563  |
| C | -4.82876 | 5.40103  | -0.22152 |
| C | -4.35941 | 4.52795  | -1.20511 |
| C | -3.06301 | 4.02054  | -1.13897 |
| C | -5.20922 | -2.72609 | 1.03012  |
| C | -6.56316 | -2.40229 | 0.94961  |
| C | -7.04681 | -1.66937 | -0.13511 |
| C | -6.16804 | -1.26546 | -1.1426  |
| C | -4.81503 | -1.59233 | -1.07201 |
| C | -3.24782 | -4.99957 | -0.70246 |
| C | -3.04608 | -6.37342 | -0.57519 |
| C | -2.27439 | -6.87622 | 0.47334  |
| C | -1.70904 | -5.99548 | 1.39794  |
| C | -1.91337 | -4.62177 | 1.28181  |
| C | 0.19748  | 5.9191   | -0.88795 |

|   |          |          |          |
|---|----------|----------|----------|
| C | 1.1509   | 6.93316  | -0.80252 |
| C | 2.07091  | 6.94575  | 0.24675  |
| C | 2.02861  | 5.93914  | 1.21382  |
| C | 1.07317  | 4.92724  | 1.13917  |
| C | 4.17518  | -2.59338 | -0.21804 |
| C | 3.70094  | -3.38198 | -1.27126 |
| C | 4.09748  | -4.71439 | -1.37164 |
| C | 4.97436  | -5.26501 | -0.43467 |
| C | 5.45304  | -4.47315 | 0.61008  |
| C | 5.05452  | -3.14152 | 0.72132  |
| H | 7.9492   | 2.14773  | 0.15363  |
| H | 7.72486  | 0.56935  | -1.75821 |
| H | 5.78054  | -0.96971 | -1.87472 |
| H | 4.27782  | 0.63255  | 1.81224  |
| H | 6.21706  | 2.17122  | 1.93936  |
| H | -2.04187 | 5.53245  | 1.73127  |
| H | -4.34851 | 6.44063  | 1.60714  |
| H | -5.83909 | 5.79645  | -0.27979 |
| H | -5.00317 | 4.24192  | -2.03239 |
| H | -2.69843 | 3.33852  | -1.89854 |
| H | -4.82741 | -3.29658 | 1.87117  |
| H | -7.23797 | -2.72022 | 1.73968  |
| H | -8.10136 | -1.4151  | -0.19594 |
| H | -6.5364  | -0.69615 | -1.99161 |
| H | -4.12987 | -1.27596 | -1.85023 |
| H | -3.84816 | -4.60359 | -1.51566 |
| H | -3.49007 | -7.04937 | -1.30092 |
| H | -2.11504 | -7.94658 | 0.57062  |
| H | -1.10788 | -6.3776  | 2.21838  |
| H | -1.47059 | -3.93731 | 1.99604  |
| H | -0.52124 | 5.90475  | -1.70133 |
| H | 1.17581  | 7.71038  | -1.56144 |
| H | 2.8157   | 7.73417  | 0.31138  |
| H | 2.7397   | 5.94233  | 2.03538  |

|   |         |          |          |
|---|---------|----------|----------|
| H | 1.04128 | 4.14327  | 1.88712  |
| H | 3.01565 | -2.9557  | -1.99478 |
| H | 3.72044 | -5.32259 | -2.18921 |
| H | 5.28284 | -6.30337 | -0.51914 |
| H | 6.13531 | -4.89106 | 1.34537  |
| H | 5.4255  | -2.52065 | 1.53099  |

### 3.2 Excitation Energies and Oscillator Strengths for HAP-3DPA

Excited State 1: Triplet-A 3.3009 eV 375.61 nm f=0.0000  $\langle S^{**2} \rangle = 2.000$

|           |          |
|-----------|----------|
| 174 ->179 | 0.15161  |
| 175 ->177 | 0.12811  |
| 175 ->178 | -0.13741 |
| 176 ->177 | 0.57976  |
| 176 ->179 | 0.10605  |

Excited State 2: Triplet-A 3.3036 eV 375.30 nm f=0.0000  $\langle S^{**2} \rangle = 2.000$

|           |          |
|-----------|----------|
| 174 ->178 | 0.14743  |
| 175 ->177 | 0.57820  |
| 175 ->179 | -0.12001 |
| 176 ->177 | -0.12890 |
| 176 ->178 | -0.13352 |

Excited State 3: Triplet-A 3.3776 eV 367.08 nm f=0.0000  $\langle S^{**2} \rangle = 2.000$

|           |         |
|-----------|---------|
| 174 ->177 | 0.52934 |
| 175 ->178 | 0.21447 |
| 176 ->179 | 0.22879 |

Excited State 4: Triplet-A 3.5088 eV 353.35 nm f=0.0000  $\langle S^{**2} \rangle = 2.000$

|           |          |
|-----------|----------|
| 173 ->177 | 0.56817  |
| 174 ->180 | 0.15211  |
| 175 ->179 | -0.12549 |
| 175 ->182 | -0.14561 |
| 176 ->178 | 0.12332  |
| 176 ->181 | 0.14670  |

Excited State 5: Singlet-A 3.5385 eV 350.39 nm f=0.0000  $\langle S^{**2} \rangle = 0.000$

|           |         |
|-----------|---------|
| 173 ->177 | 0.69074 |
|-----------|---------|

Excited State 6: Singlet-A 3.6255 eV 341.98 nm f=0.3979  $\langle S^{**2} \rangle = 0.000$

|           |         |
|-----------|---------|
| 176 ->177 | 0.68922 |
|-----------|---------|

Excited State 7: Singlet-A 3.7400 eV 331.50 nm  $f=0.4328$   $\langle S^2 \rangle=0.000$   
 175  $\rightarrow$  177 0.69156  
 Excited State 8: Singlet-A 3.7513 eV 330.51 nm  $f=0.0015$   $\langle S^2 \rangle=0.000$   
 164  $\rightarrow$  177 -0.13631  
 170  $\rightarrow$  177 -0.12743  
 174  $\rightarrow$  177 0.66681

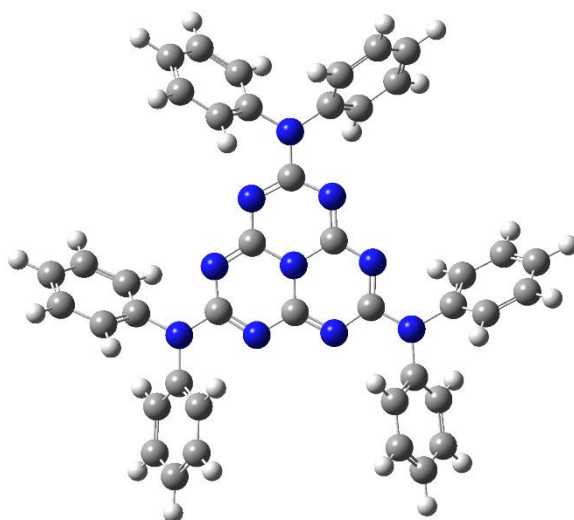

**Figure S3.** The optimized geometry of the ground state of HAP-3DPA by theoretical calculations.

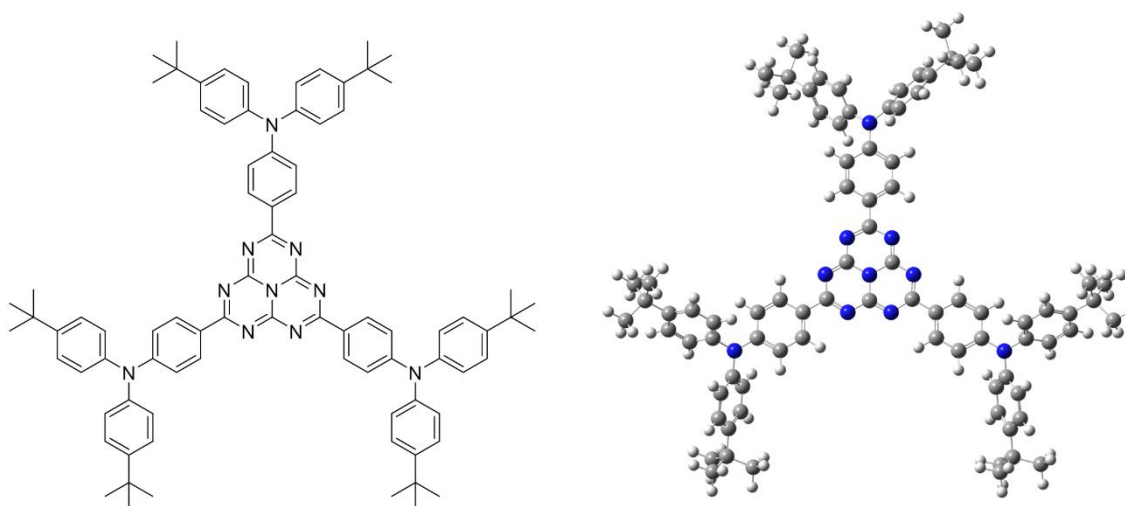

**Figure S4.** Molecular structure (left), and optimized geometry of the ground state (right) of HAP-3TPA by theoretical calculations.

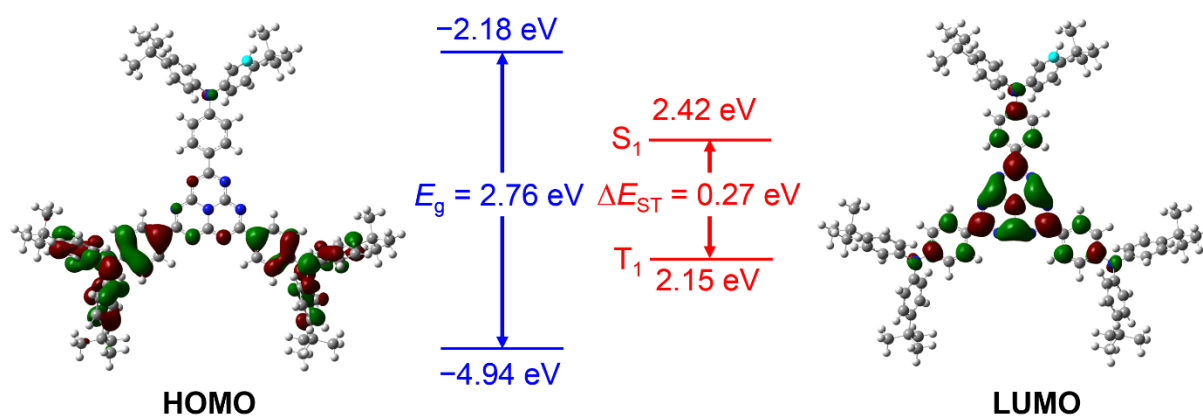

**Figure S5.** Frontier molecular orbital distributions and energy levels of the lowest excited singlet and triplet states of HAP-3TPA by theoretical calculations.

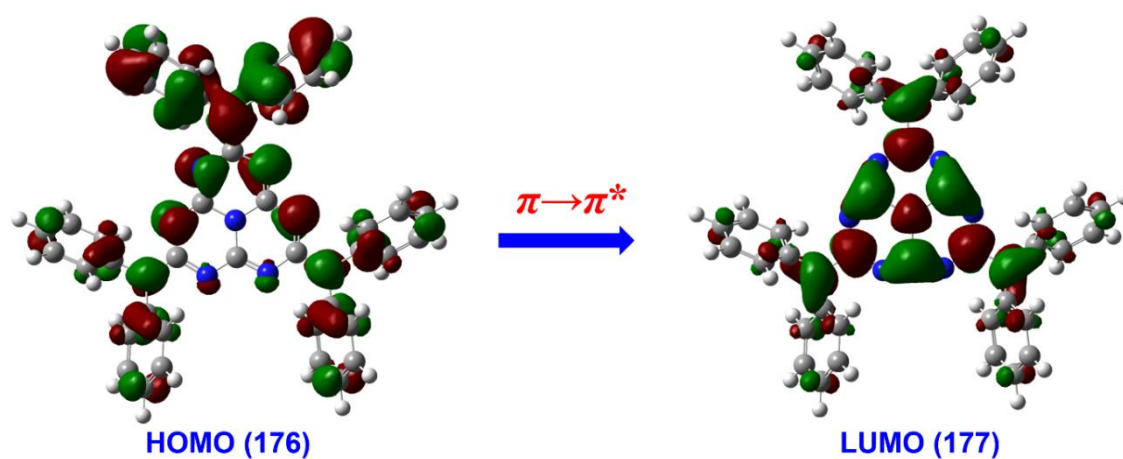

**Figure S6.** The natural transition orbitals (176  $\rightarrow$  177) for the lowest excited triplet state ( $T_1$ ) of HAP-3DPA by theoretical calculations.

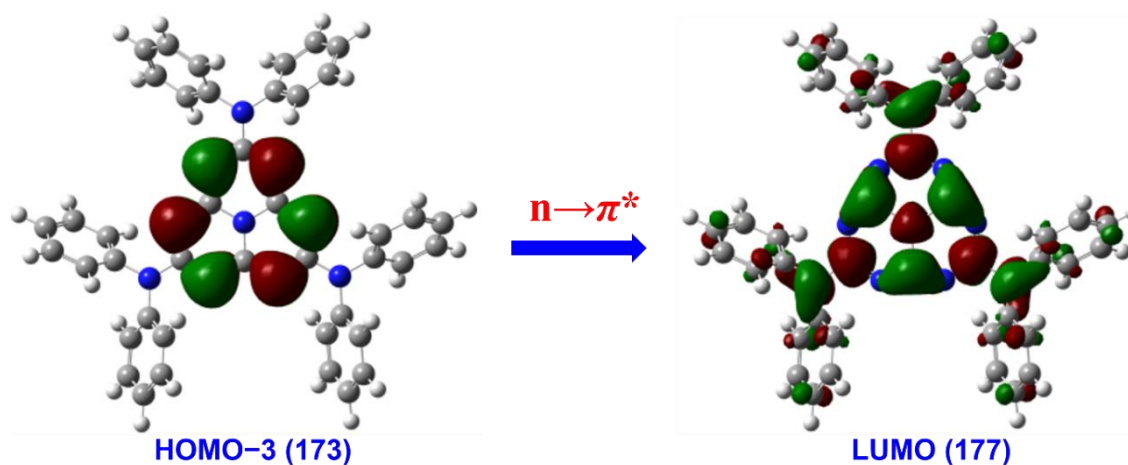

**Figure S7.** The natural transition orbitals (173  $\rightarrow$  177) for the lowest excited singlet state ( $S_1$ ) of HAP-3DPA by theoretical calculations.



#### 4. Photophysical Properties

**Table S1.** The PLQYs of HAP-3DPA in DPEPO doped films at various concentrations.

| Concentration         | PLQY |
|-----------------------|------|
| 2 wt% HAP-3DPA:DPEPO  | 64%  |
| 6 wt% HAP-3DPA:DPEPO  | 67%  |
| 10 wt% HAP-3DPA:DPEPO | 60%  |

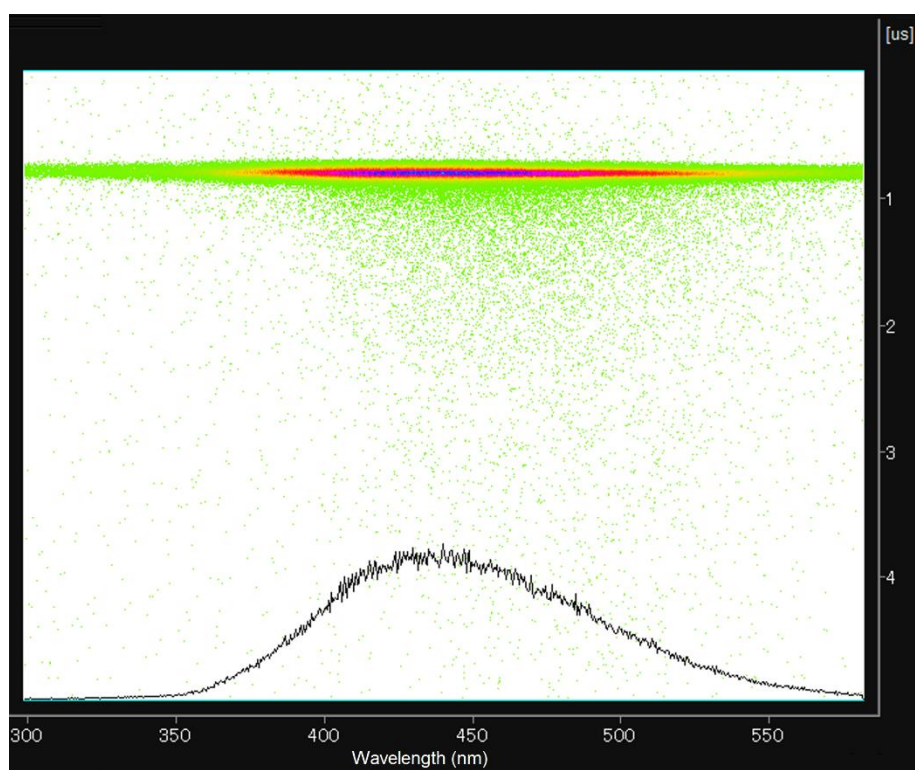

**Figure S8.** The transient PL decay image of 6 wt% HAP-3DPA:DPEPO doped film in the time range of 5  $\mu$ s.

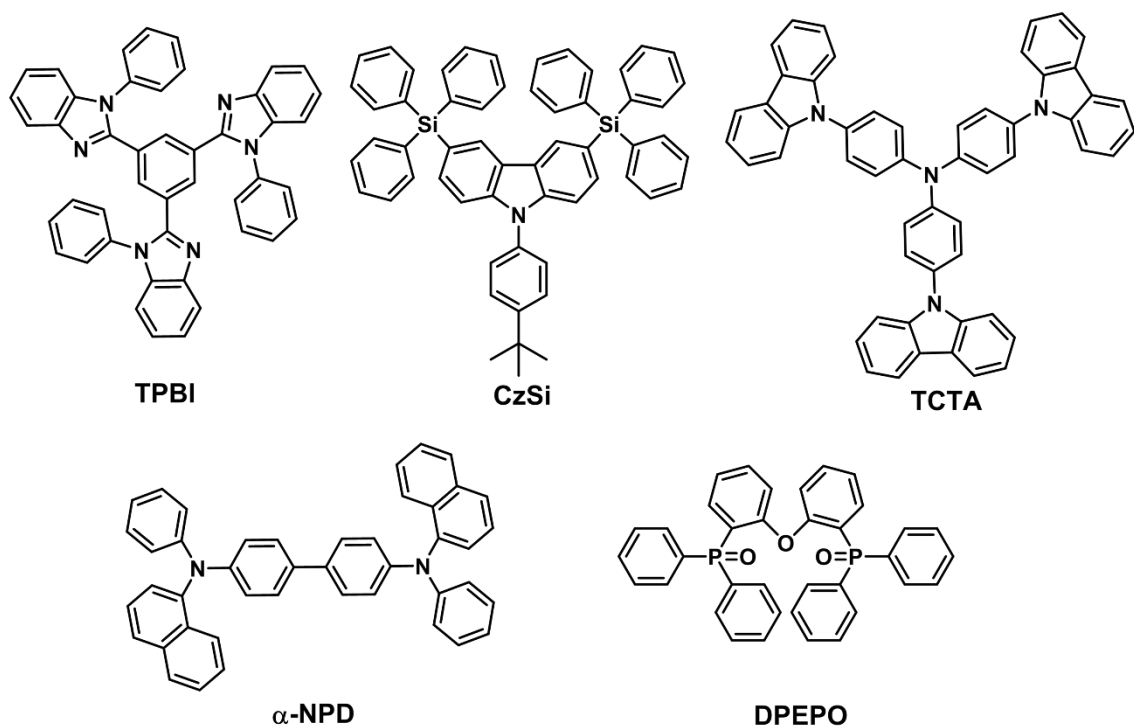

**Figure S9.** The molecular structures of organic compounds used in the OLED device.

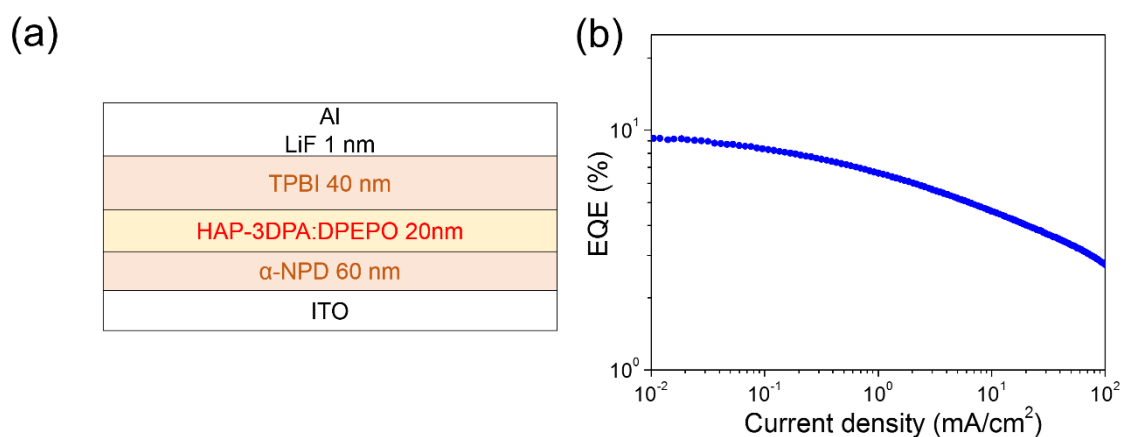

**Figure S10.** (a) The three-layered OLED structure. (b) EQE as a function of current density.

**Table S2.** The EL performance of three-layered OLED based on HAP-3DPA.

| Emitter  | $V_{\text{on}}$ (V) <sup>a</sup> | $\lambda_{\text{EL}}$ (nm) | $L_{\text{max}}$ (cd m <sup>-2</sup> ) | EQE (%) | CIE (x, y) |
|----------|----------------------------------|----------------------------|----------------------------------------|---------|------------|
| HAP-3DPA | 4.0                              | 441                        | 8760                                   | 9.5     | 0.16, 0.13 |

<sup>a</sup> Turn-on voltage at 1 cd m<sup>-2</sup>.

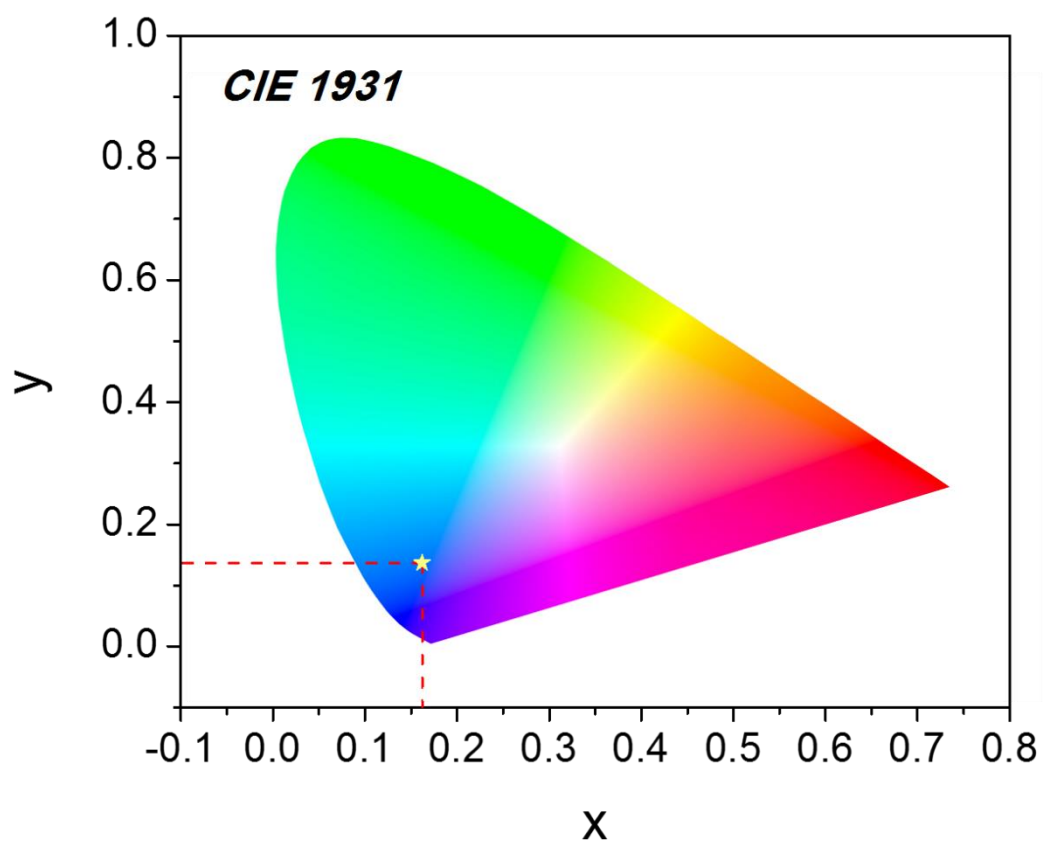

**Figure S11.** The Commission Internationale de l'Eclairage (CIE) coordinates of (0.16, 0.13) for HAP-3DPA.

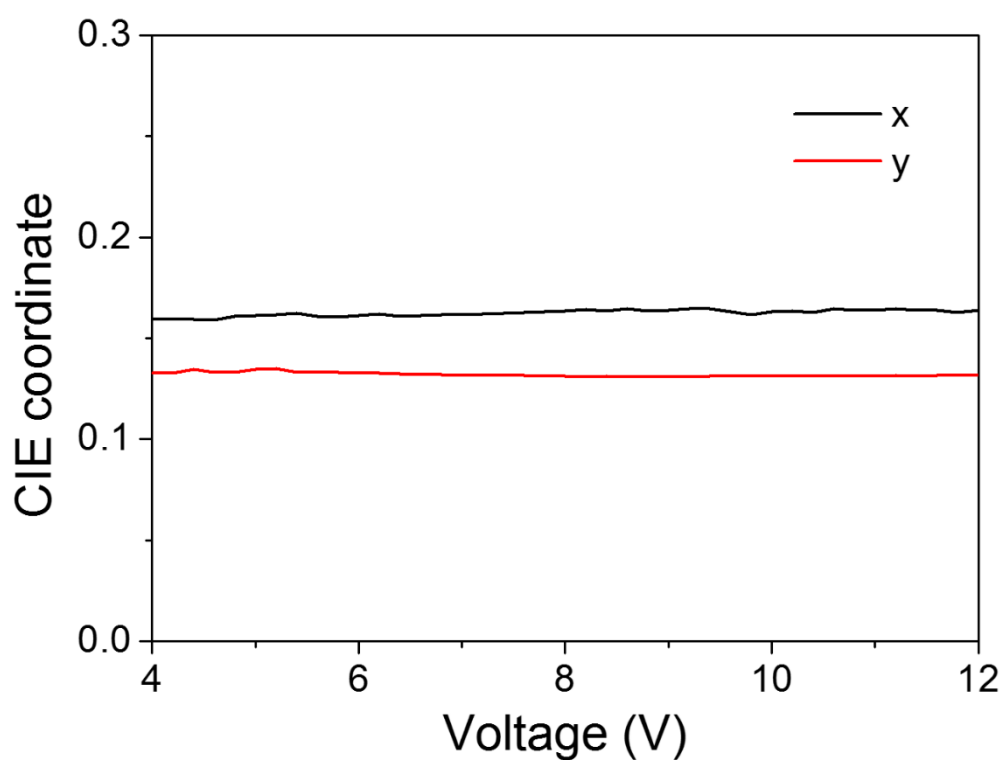

**Figure S12.** The CIE coordinates of HAP-3DPA based OLED with applied voltage increasing.

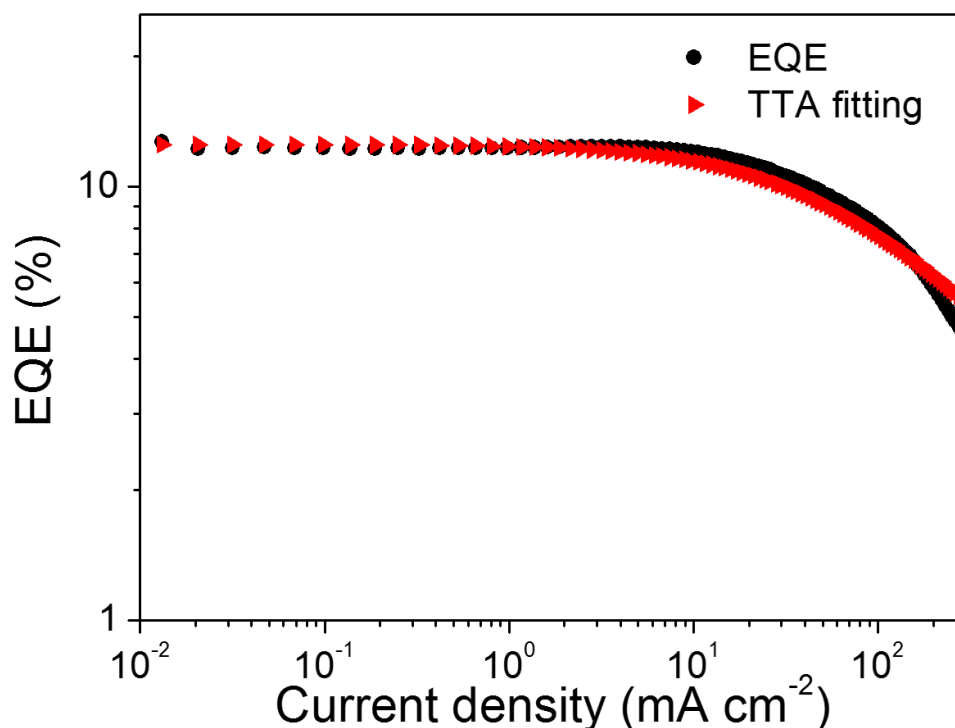

**Figure S13.** The EQE characteristics with theoretical triplet-triplet annihilation (TTA) fitting.

## 5. References

- S1 M. J. Frisch, G. W. Trucks, H. B. Schlegel, G. E. Scuseria, M. A. Robb, J. R. Cheeseman, G. Scalmani, V. Barone, B. Mennucci, G. A. Petersson, H. Nakatsuji, M. Caricato, X. Li, H. P. Hratchian, A. F. Izmaylov, J. Bloino, G. Zheng, J. L. Sonnenberg, M. Hada, M. Ehara, K. Toyota, R. Fukuda, J. Hasegawa, M. Ishida, T. Nakajima, Y. Honda, O. Kitao, H. Nakai, T. Vreven, J. A. Montgomery, Jr., J. E. Peralta, F. Ogliaro, M. Bearpark, J. J. Heyd, E. Brothers, K. N. Kudin, V. N. Staroverov, R. Kobayashi, J. Normand, K. Raghavachari, A. Rendell, J. C. Burant, S. S. Iyengar, J. Tomasi, M. Cossi, N. Rega, J. M. Millam, M. Klene, J. E. Knox, J. B. Cross, V. Bakken, C. Adamo, J. Jaramillo, R. Gomperts, R. E. Stratmann, O. Yazyev, A. J. Austin, R. Cammi, C. Pomelli, J. W. Ochterski, R. L. Martin, K. Morokuma, V. G. Zakrzewski, G. A. Voth, P. Salvador, J. J. Dannenberg, S. Dapprich, A. D. Daniels, Ö. Farkas, J. B. Foresman, J. V. Ortiz, J. Cioslowski, and D. J. Fox, *Gaussian 09, Revision C.01*. (Gaussian, Inc., 2009).
